# Supplementary material for: Histopathological and Immunological Findings in the Common Marmoset Following Exposure to Aerosolized SARS-CoV-2
Source: MDPI journal article supplement (doi:10.3390/v14071580), 2022-07-21
Supplement: s1 [file s1]

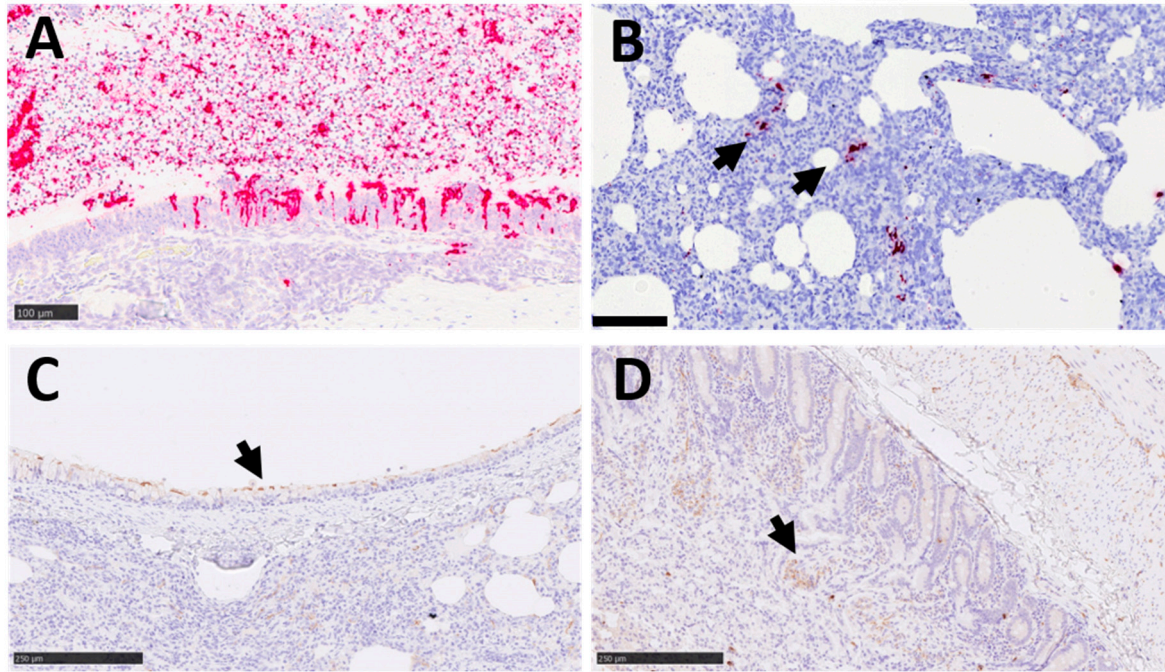

**Figure S1.** Positive control images from animals infected with SARS-CoV-2. RNAScope ISH stain of virus RNA (*S-gene*) in hamster nasal cavity lung showing intense positive staining in the epithelium and exudates (A) and mild positive staining in rhesus macaque lung showing multiple positive cells (arrows) within areas of interstitial pneumonia (B); ACE2 IHC stain of a large bronchus from rhesus macaque showing moderate positive reaction in the bronchial epithelium (arrow) (C); TMPRSS2 IHC detection in small intestine mucosa (arrow) and other layers from rhesus macaque (Bar = 250 μm) (D).
